# Supplementary material for: Construction of electrochemical immunosensors based on redox hydrogels for ultrasensitive detection of carcinoembryonic antigens
Source: Royal Society of Chemistry journal article supplement (doi:10.1039/d1nj01282g), 2021-01-01
Supplement: d1nj01282g1.pdf [file d1nj01282g1.pdf]

## Electronic Supplementary Information

### Construction of electrochemical immunosensor based on redox hydrogel for ultrasensitive detection of carcinoembryonic antigen

Xiangrong Huang,<sup>a</sup> Na Wu,<sup>a</sup> Wenxiu Liu,<sup>a</sup> Yazhuo Shang,<sup>\*a</sup> Honglai Liu,<sup>a</sup> Yifan He,<sup>b</sup> Hong Meng<sup>b</sup> and Yinmao Dong<sup>b</sup>

<sup>a</sup> Key Laboratory for Advanced Materials, School of Chemistry & Molecular Engineering, East China University of Science and Technology, Shanghai 200237, China

<sup>b</sup> Key Laboratory of Cosmetic, China National Light Industry, School of Science, Beijing Technology and Business University, Beijing 100048, China

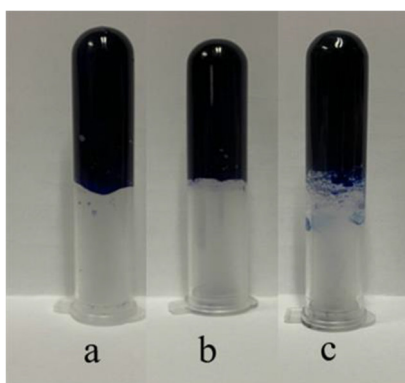

**Fig. S1** Photographs of CNC-MB gel (a), CNC-MB-MWCNT gel (b), and CNC-MB-MWCNT-PDA-rGO-AuNPs gel (c) in centrifuge tubes.

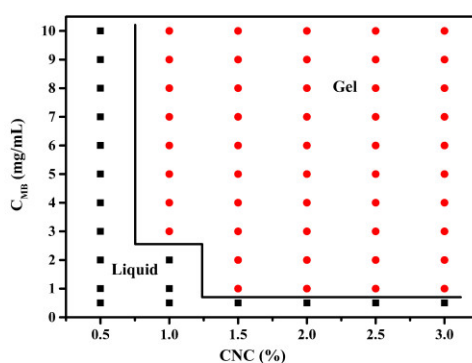

**Fig. S2** State diagram outlining the CNC and MB concentration regimes of the formation of hydrogel.

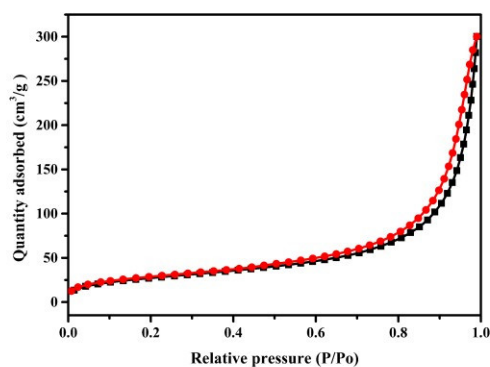

**Fig. S3** Nitrogen adsorption-desorption isotherm of dehydrated CNC-MB-MWCNT-PDA-rGO-AuNPs gel.

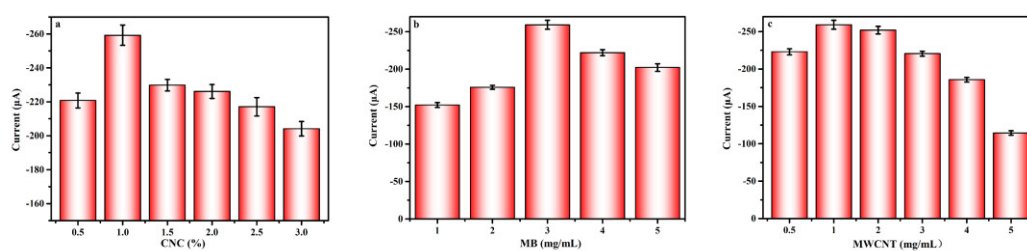

**Fig. S4** Effect of the concentration of CNC (a), MB (b), and MWCNT (c) on the SWV responses for CNC-MB-MWCNT-PDA-rGO-AuNPs gel modified immunosensor.

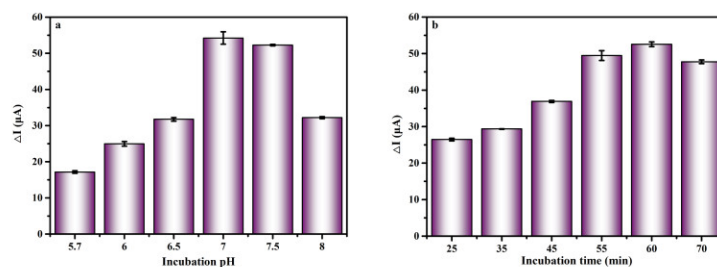

**Fig. S5** Effects of the incubation pH (a) and incubation time (b) on the SWV responses of the immunosensor for  $50 \text{ ng} \cdot \text{mL}^{-1}$  CEA.
